# Supplementary material for: Dual-mechanism based CTLs infiltration enhancement initiated by Nano-sapper potentiates immunotherapy against immune-excluded tumors
Source: PubMed Central journal article supplement (PMC6992734; doi:10.1038/s41467-020-14425-7), 2020-01-30
Supplement: 41467_2020_14425_MOESM1_ESM.pdf [file 41467_2020_14425_MOESM1_ESM.pdf]

Supplementary Information for

**Dual-Mechanism Based CTLs Infiltration Enhancement Initiated by Nano-sapper  
Potentiates Immunotherapy against Immune-Excluded Tumors**

Huang et al.

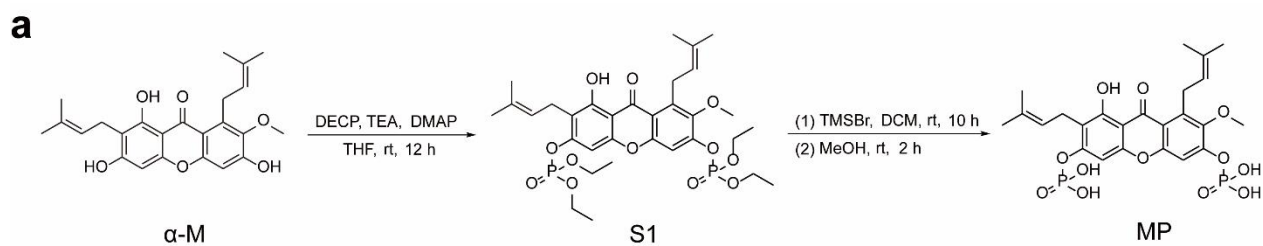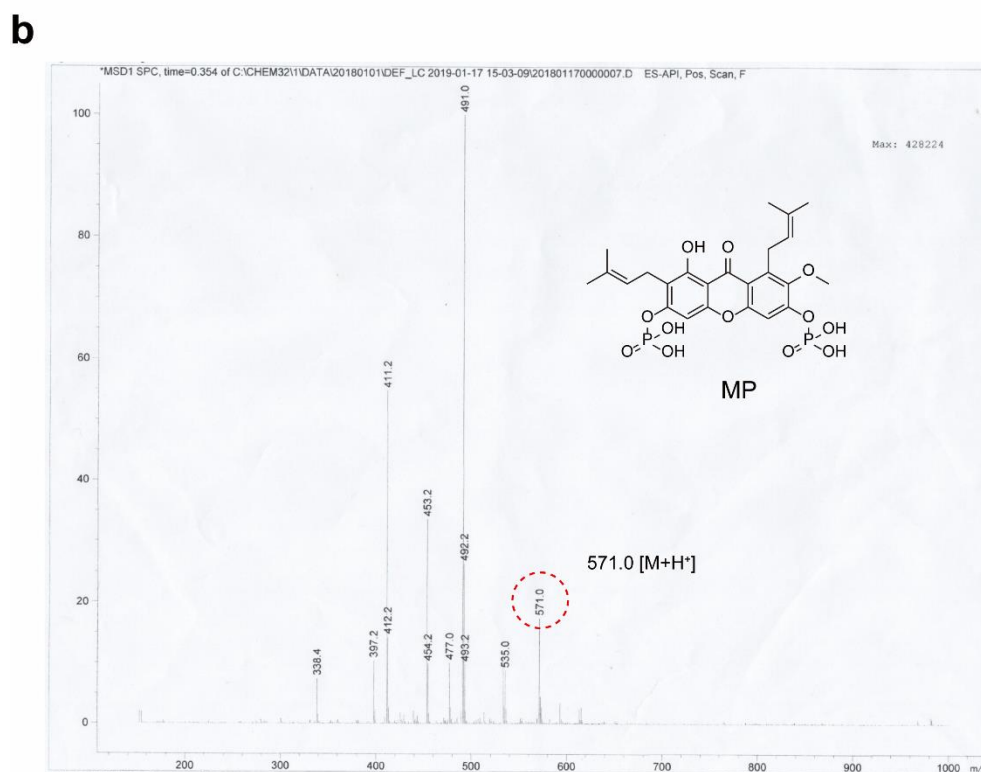

**Supplementary Figure 1** The synthesis of MP. **a** The synthetic route of MP; **b** The mass spectra of MP. MP,  $\alpha$ -mangostin phosphate

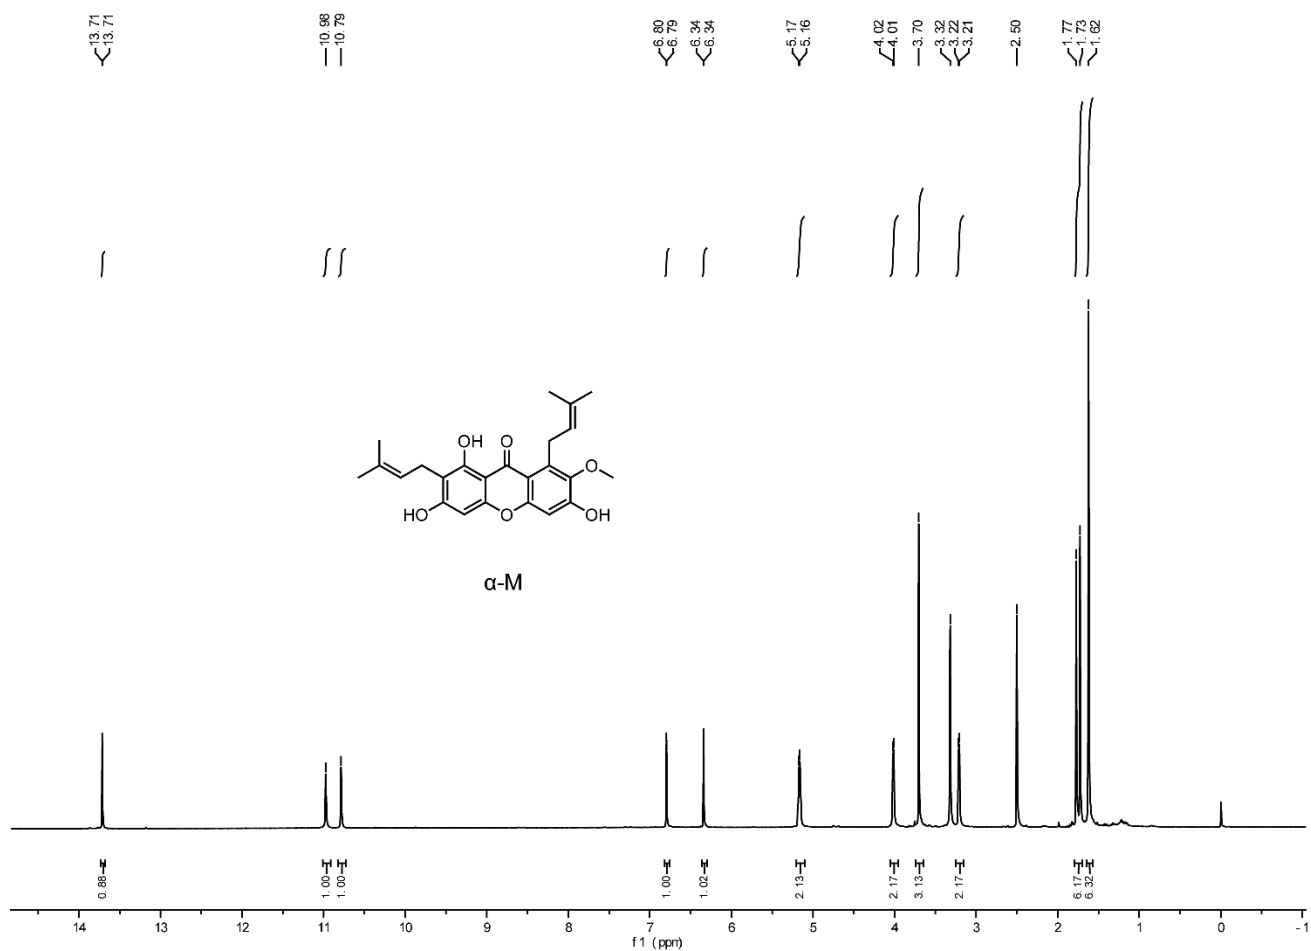

**Supplementary Figure 2**  $^1\text{H-NMR}$  spectra of  $\alpha$ -M.  $^1\text{H NMR}$  (600 MHz, DMSO- $d_6$ ):  $\delta = 13.71$  (d,  $J = 2.3$  Hz, 1H), 10.98 (s, 1H), 10.79 (s, 1H), 6.80 (d,  $J = 2.3$  Hz, 1H), 6.34 (d,  $J = 1.8$  Hz, 1H), 5.17 (d,  $J = 7.1$  Hz, 2H), 4.02 (d,  $J = 5.2$  Hz, 2H), 3.70 (s, 3H), 3.21 (d,  $J = 6.7$  Hz, 2H), 1.75 (d,  $J = 27.8$  Hz, 6H), 1.62 (s, 6H).

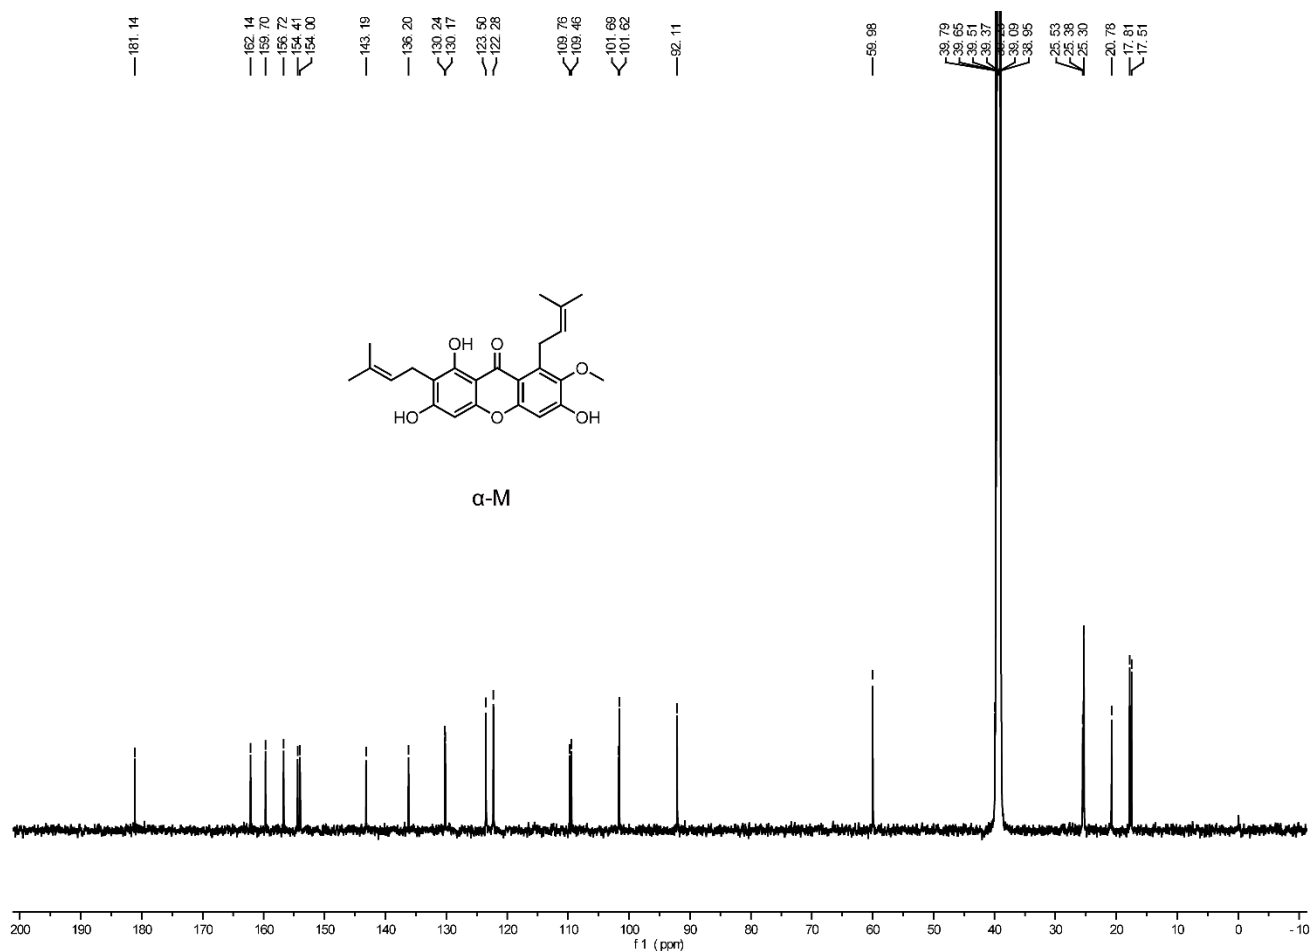

**Supplementary Figure 3**  $^{13}\text{C}$ -NMR spectra of  $\alpha$ -M.  $^{13}\text{C}$  NMR (151 MHz,  $\text{DMSO-}d_6$ ):  $\delta = 181.14$ , 162.14, 159.70, 156.72, 154.41, 154.00, 143.19, 136.20, 130.24, 130.17, 123.50, 122.28, 109.76, 109.46, 101.69, 101.62, 92.11, 59.98, 25.53, 25.38, 25.30, 20.78, 17.81, 17.51.

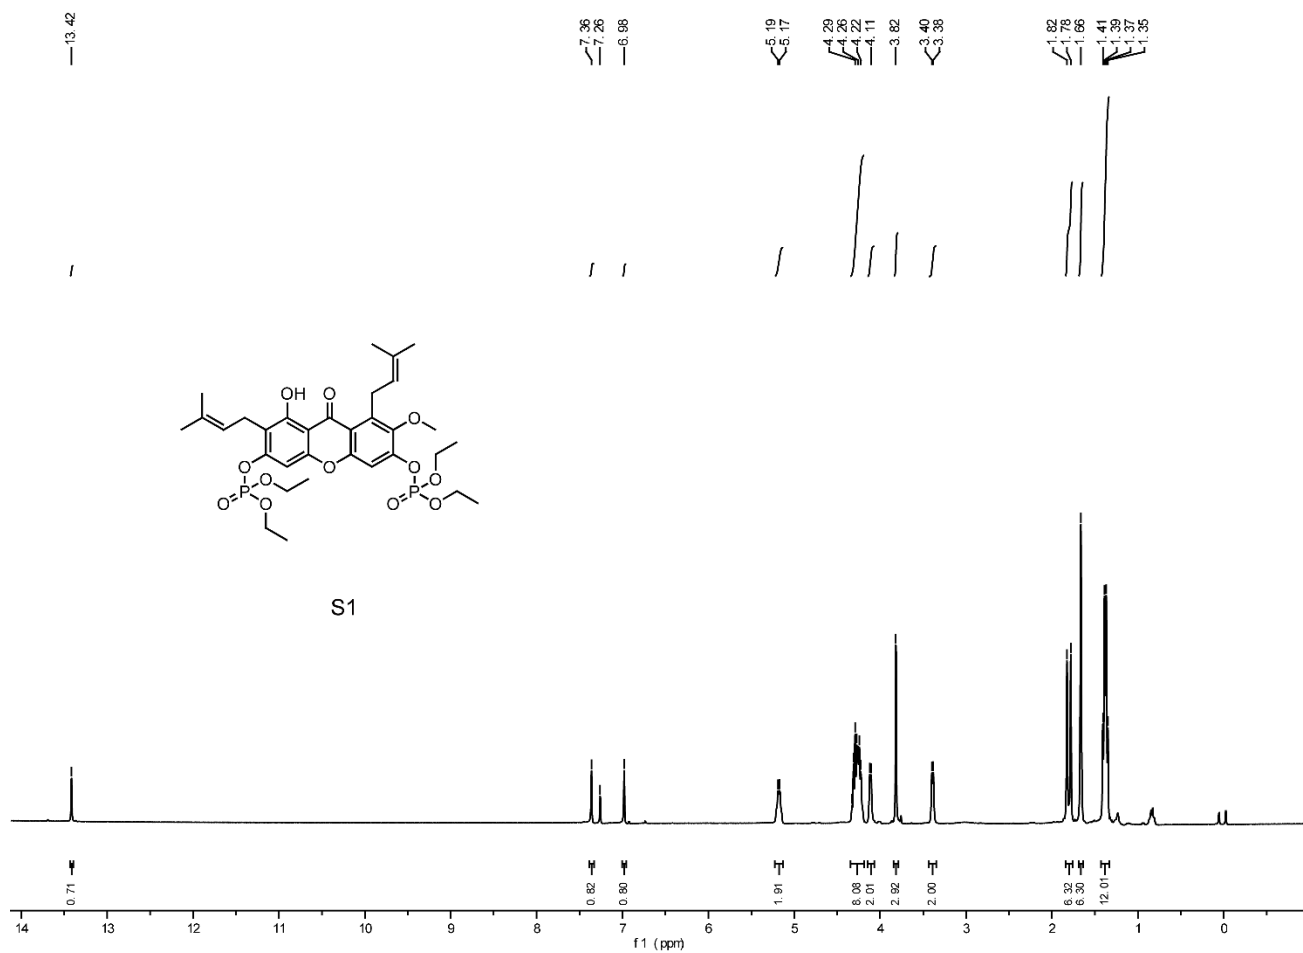

**Supplementary Figure 4**  $^1\text{H}$ -NMR spectra of S1.  $^1\text{H}$  NMR (600 MHz,  $\text{CDCl}_3$ ):  $\delta = 13.43$  (s, 1H), 7.37 (s, 1H), 6.99 (s, 1H), 5.19 (d,  $J = 7.4$  Hz, 2H), 4.36 – 4.20 (m, 8H), 4.12 (d,  $J = 5.8$  Hz, 2H), 3.83 (s, 3H), 3.40 (d,  $J = 6.4$  Hz, 2H), 1.82 (s, 3H), 1.78 (s, 3H) 1.67 (s, 6H), 1.39 (dd,  $J = 15.9, 7.7$  Hz, 12H).

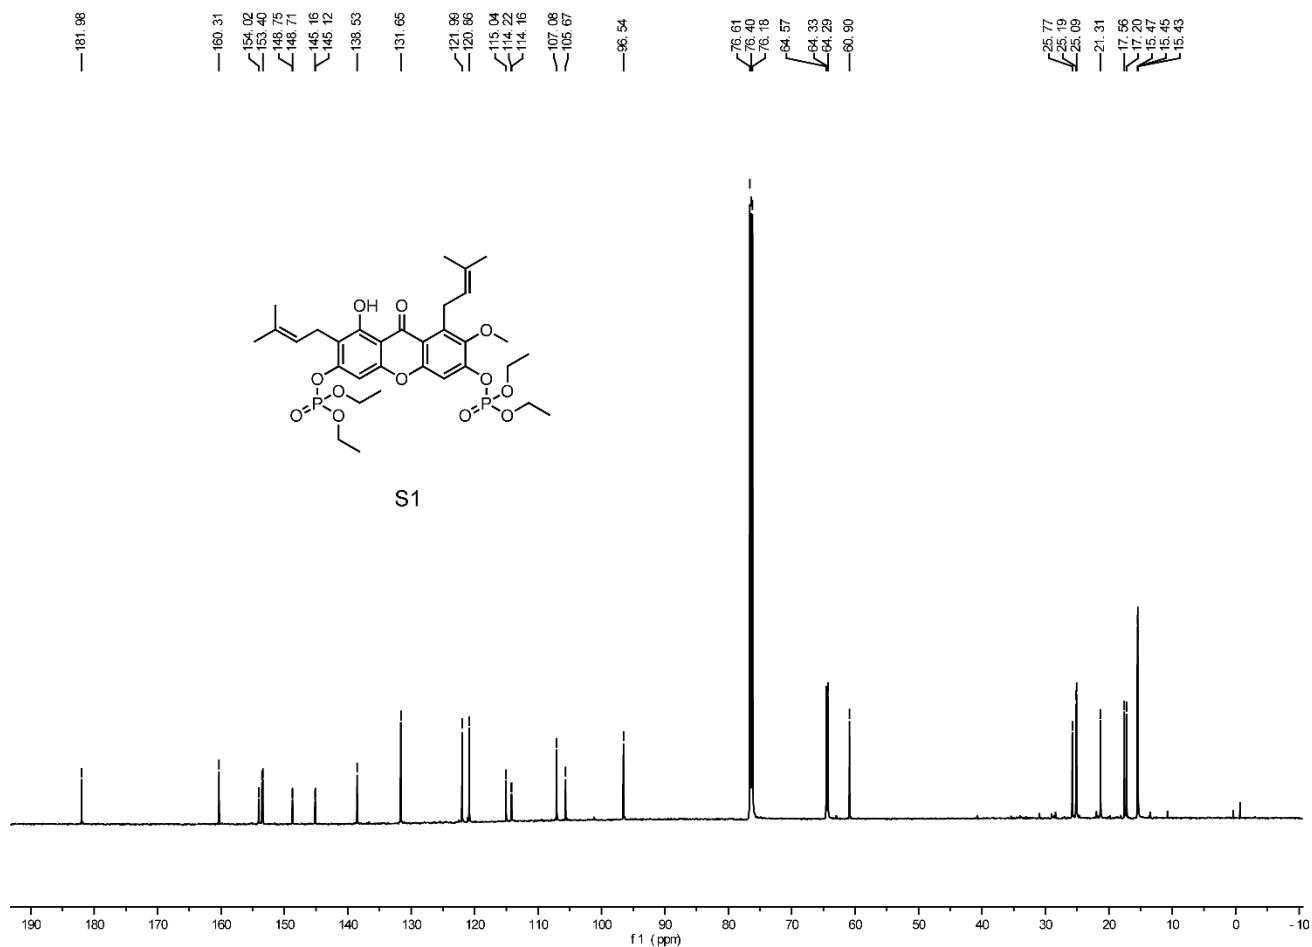

**Supplementary Figure 5**  $^{13}\text{C}$ -NMR spectra of S1.  $^{13}\text{C}$  NMR (151 MHz,  $\text{CDCl}_3$ ):  $\delta = 181.98, 160.31, 154.05, 154.02, 153.53, 153.40, 148.75, 148.71, 145.16, 145.12, 138.53, 131.65, 121.99, 120.86, 115.04, 114.22, 114.16, 107.08, 105.67, 96.54, 76.61, 76.40, 76.18, 64.57, 64.53, 64.33, 64.29, 60.90, 25.77, 25.19, 25.09, 21.31, 17.56, 17.20, 15.47, 15.45, 15.43$ .

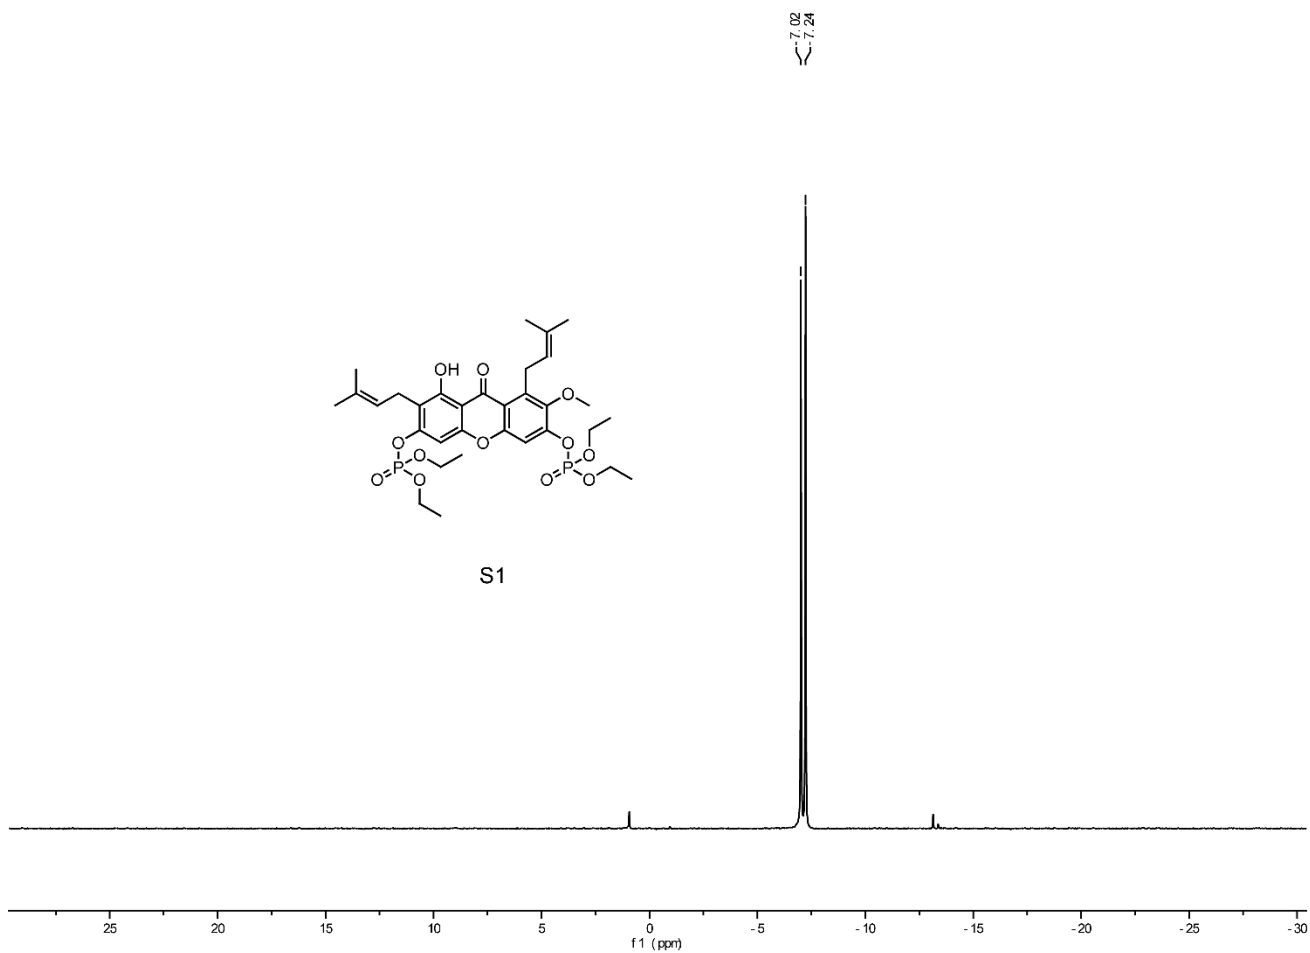

**Supplementary Figure 6**  $^{31}\text{P}$ -NMR spectra of S1.  $^{31}\text{P}$  NMR (162 MHz,  $\text{CDCl}_3$ ):  $\delta = -7.02, -7.24$  ppm.

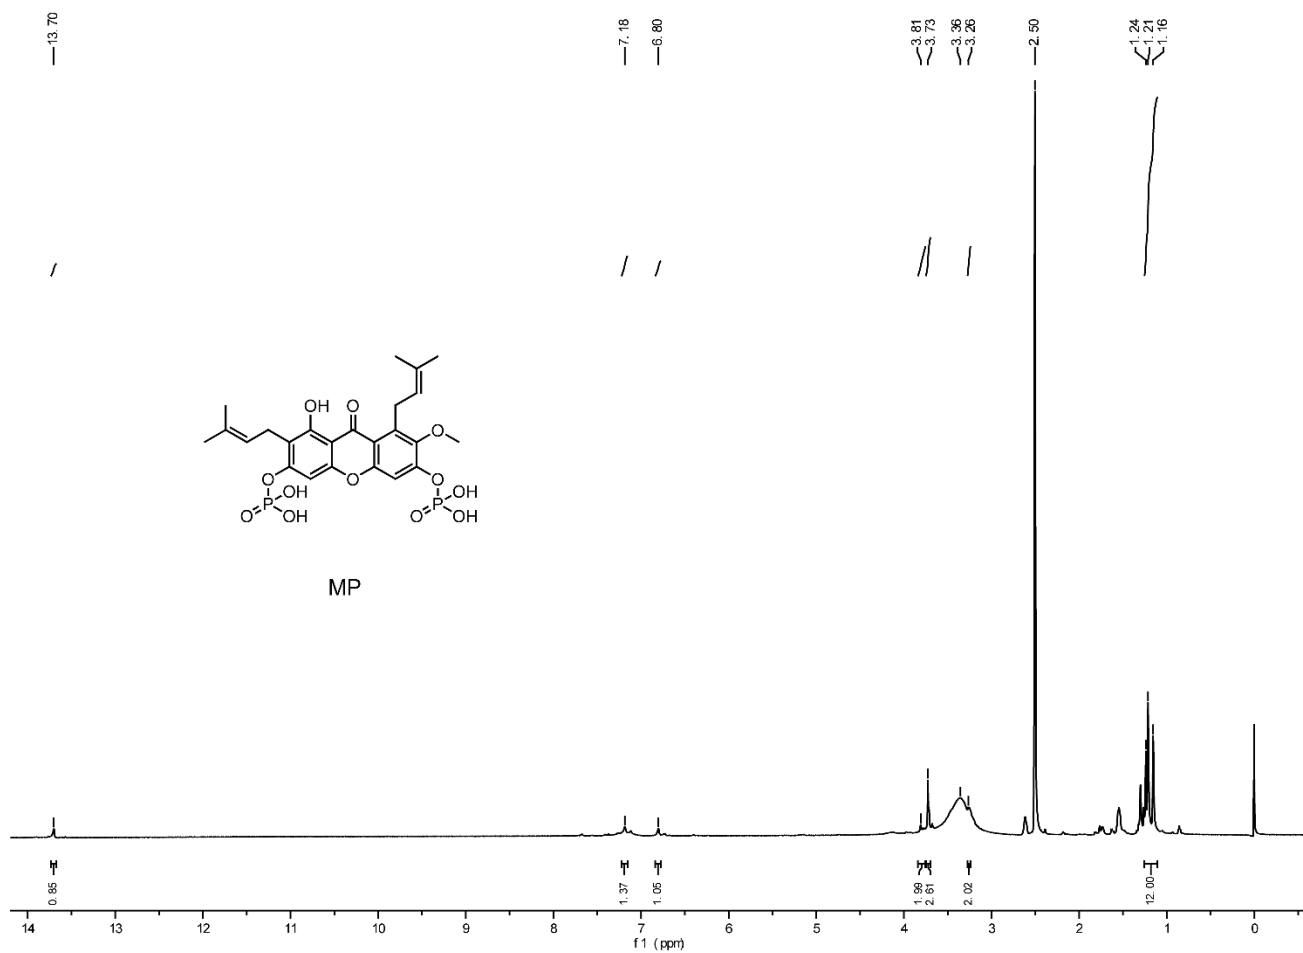



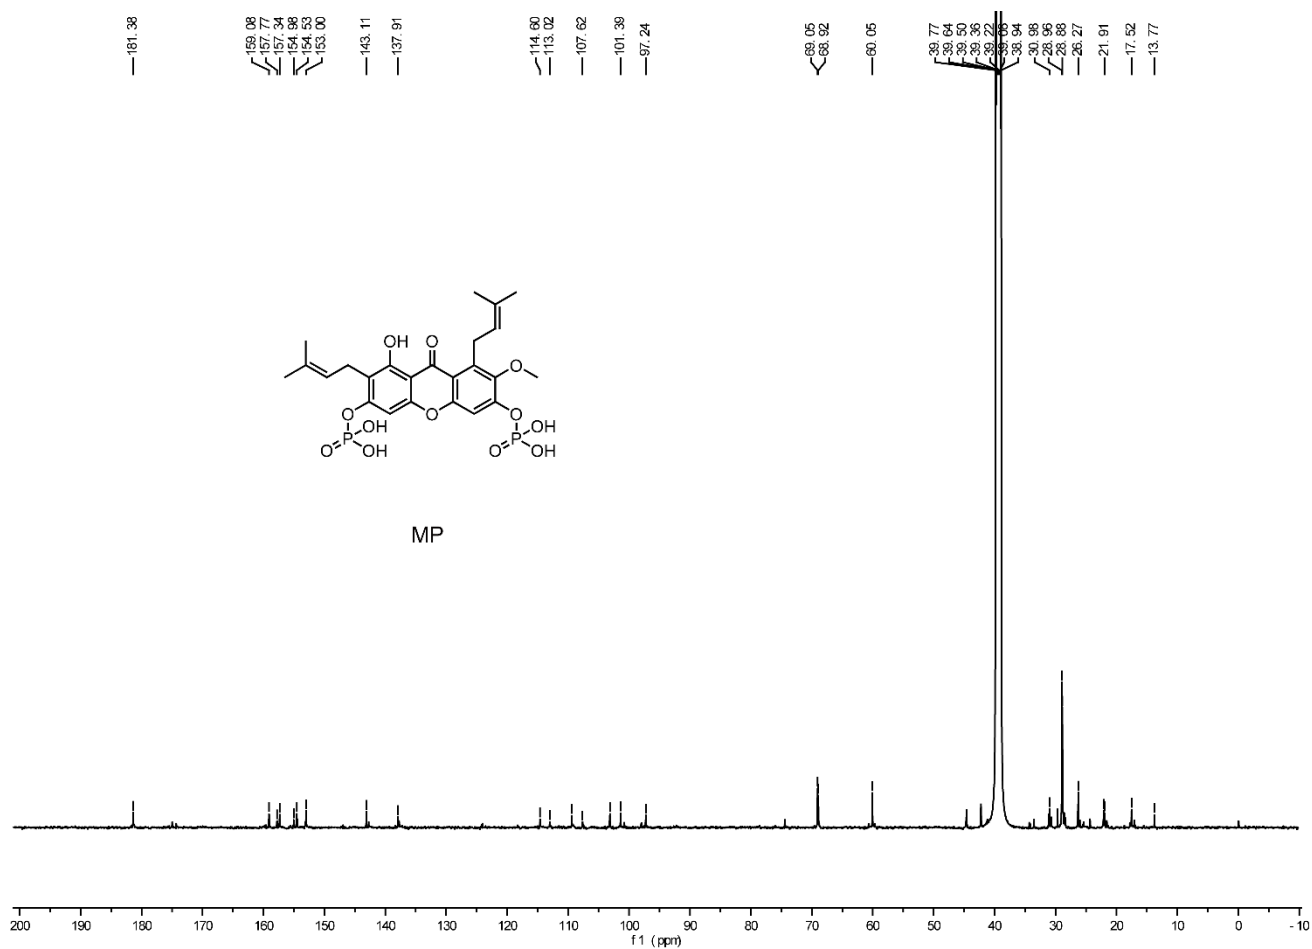

**Supplementary Figure 8** <sup>13</sup>C-NMR spectra of MP. <sup>13</sup>C NMR (150 MHz, CDCl<sub>3</sub>):  $\delta$  = 150.3, 147.6, 133.6, 133.1, 132.5, 132.1, 131.9, 129.4, 127.3, 127.2, 127.1, 126.3, 125.6, 125.2, 124.7, 117.5, 117.2, 112.3, 98.0, 65.3, 14.5 ppm.

-1.39

-7.54

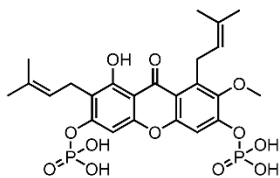

MP

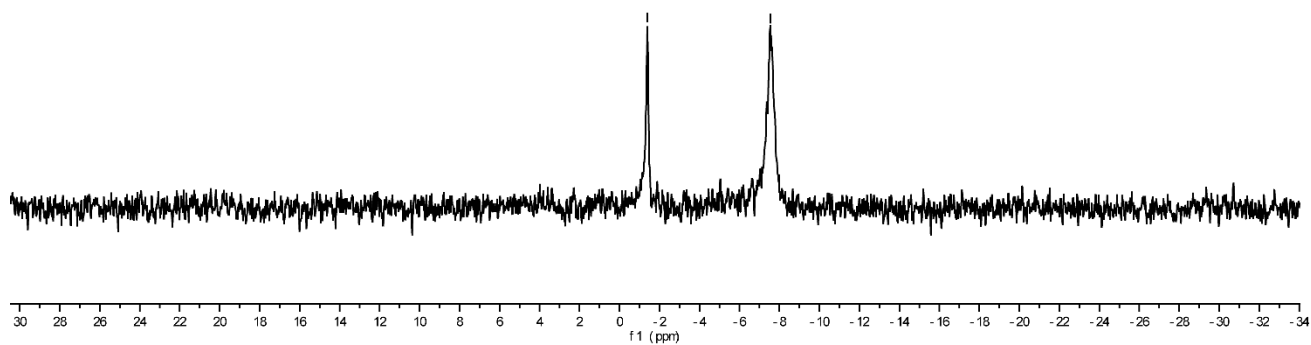

**Supplementary Figure 9** <sup>31</sup>P-NMR spectra of MP. <sup>31</sup>P NMR (162 MHz, DMSO-*d*<sub>6</sub>)  $\delta = -1.39, -7.54$  ppm.

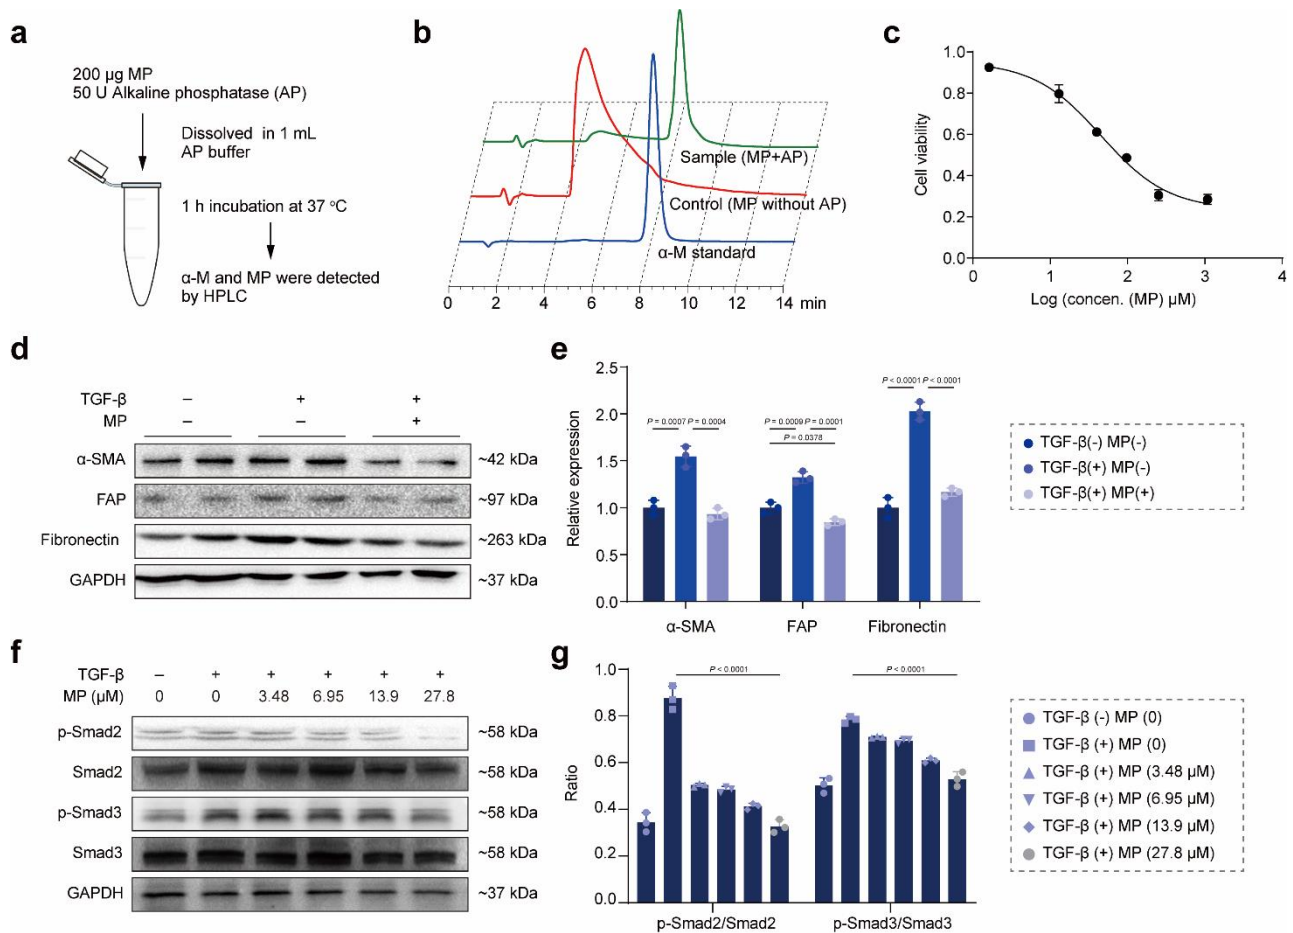

**Supplementary Figure 10** The conversion of MP to  $\alpha$ -M and the reversion of CAFs without inducing apparent cytotoxicity by MP. **a,b** General procedures and HPLC spectrums of the solution containing free MP and AP after 1 h incubation at 37 °C. **c** The cytotoxicity of MP in activated NIH3T3 cells (pre-treated with TGF- $\beta$  at 10 ng/mL for 24 h). ( $n = 3$  independent experiments). **d,e** The expression of  $\alpha$ -SMA, FAP and fibronectin in activated NIH3T3 after incubation with MP at 27.8  $\mu$ M for 24 h and semi-quantitatively analyzed by ImageJ. ( $n = 3$  independent experiments). **f,g** Phosphorylation of Smad2 and Smad3 in activated NIH3T3 were inhibited after incubation with MP for 24 h. ( $n = 3$  independent experiments). Data are presented as mean  $\pm$  s.d., One-way ANOVA with Bonferroni multiple comparisons post-test was used for **e,g**. Error bars represent s.d.. Source data of Supplementary Fig. 10d and f are provided as a Source Data file.

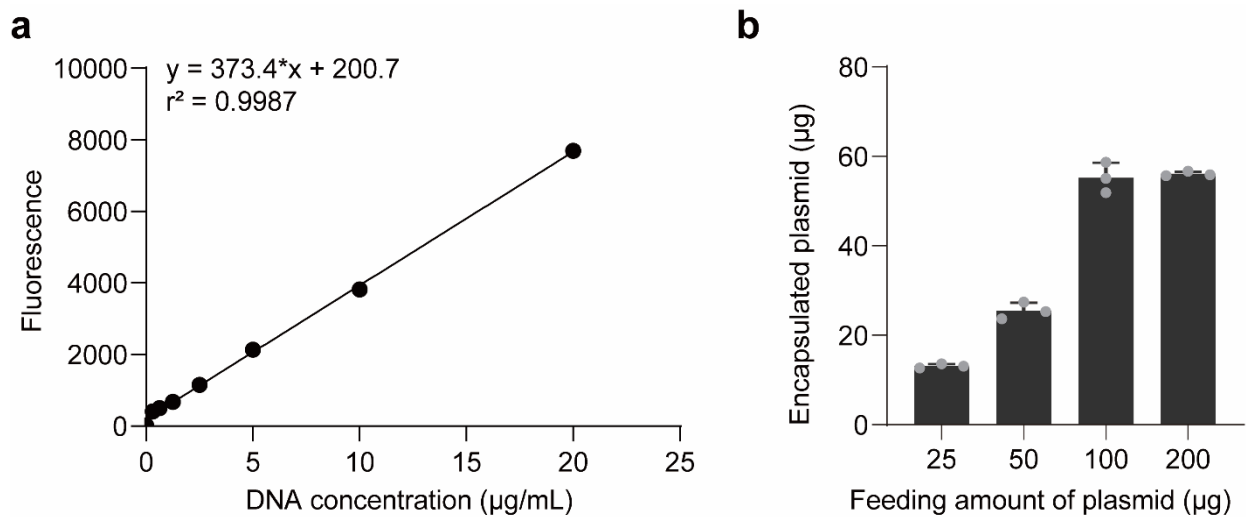

**Supplementary Figure 11** The determination of plasmid concentration. **a** Concentration curve from 0.0 to 20  $\mu\text{g/ml}$  with linear regression analysis. **b** The encapsulated plasmid detected by Hoechst 33258 staining.  $n = 3$  independent samples Data are presented as mean  $\pm$  s.d. Error bars represent s.d..

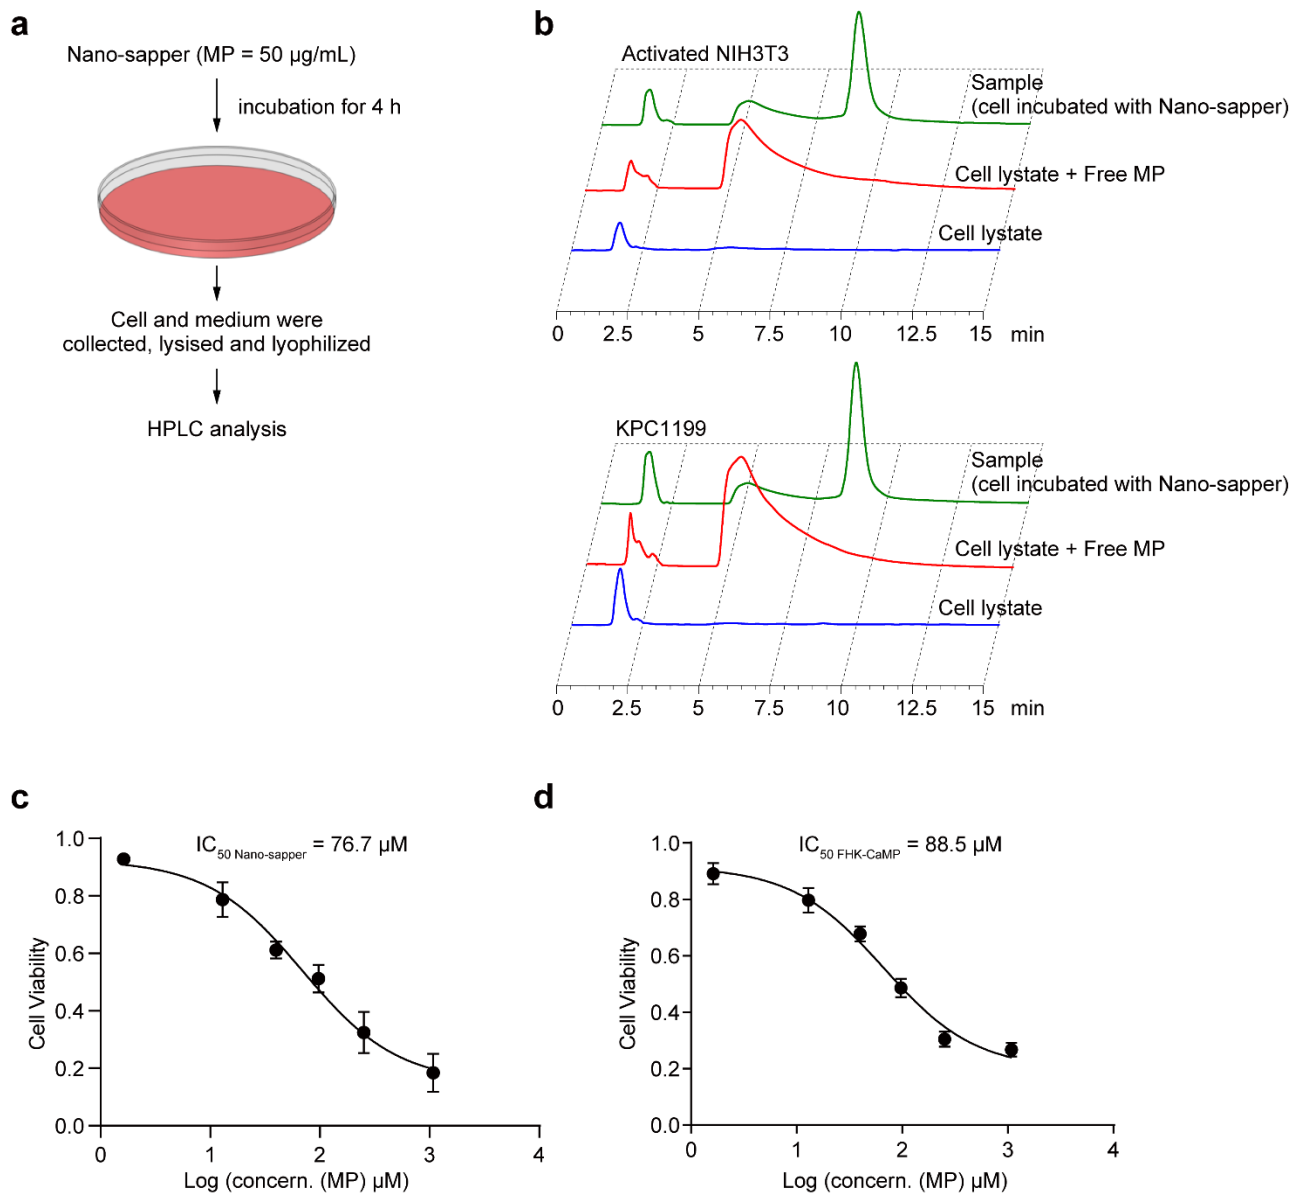

**Supplementary Figure 12** The degradation and cytotoxicity of Nano-sapper. **a,b** General procedures and HPLC analysis of Nano-sapper incubated with activated NIH3T3 or KPC1199 cells. **c,d** Cytotoxicity of indicated nanoparticles with varied MP concentration were incubated with activated NIH3T3 for 24 h. Data are presented as mean  $\pm$  s.d. ( $n = 3$  independent experiments). Error bars represent s.d..

**a**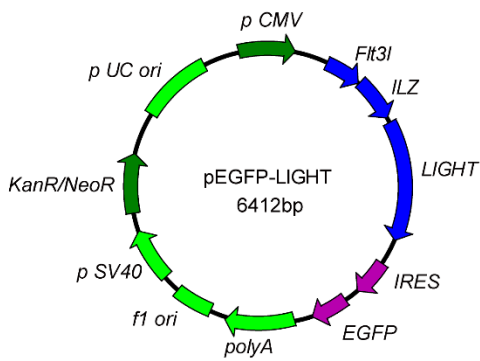

```

ATGACAGTGTGGCGCCAGCCTGGAGCCCAAATTCCTCCCTGTTGCTGCTGTTGCT
GCTGCTGAGTCCTTGCCTGCGGGGGACACCTGACTGTTACTTCAGCCACAGTCCCA
TCTCCTCCAACTTCAAAGTGAAGTTTAGAGAGTTGACTGACCACCTGCTTAAAGATTA
CCCAGTCACTGTGGCCGTC AATCTTCAGGACGAGAAGCACTGCAAGGCCTTGTGGA
GCCTCTTCTAGCCCAGATGAAACAGATCGAGGACAAGATAGAGGAGATACTGTCTA
AGATCTACCACATAGAGAACGAGATAGCAAGAATCAAAAACTGATAGGGGAGAGAC
TGCATCAACGTCTTGGAGACATAGTAGCTCATCTGCCAGATGGAGGCAAAGGCTCCT
GGGAGAAGCTGATACAAGATCAACGATCTCACCAGGCCAACCAGCAGCACATCTTA
CAGGAGCCAACGCCAGCTTGATAGGTATTGGTGGACCTCTGTTATGGGAGACACGA
CTTGGCCTGGCCTTCTTGAGGGGCTTGACGTATCATGATGGGGCCCTGGTGACCAT
GGAGCCCGTTACTACTATGTGTACTCCAAGTGCAGCTGAGCGGCGTGGGCTGCC
CCCAGGGGCTGGCCAATGGCCTCCCATCACCCATGGACTATACAAGCGCACATCC
CGCTACCCGAAGGAGTTAGAACTGCTGGTCAGTCGGCGGTACCCTGTGGCCGGG
CCAACAGCTCCCGAGTCTGGTGGGACAGCAGCTTCCTGGGCGGCGTGGTACATCT
GGAGGCTGGGGAAAGAGTGGTGGTCCGCGTGCCTGGAAACCGCCTGGTTCAGACC
ACGTGACGGCACCAAGTCTATTTCCGGAGCTTTCATGGTCTGA.

```

**b**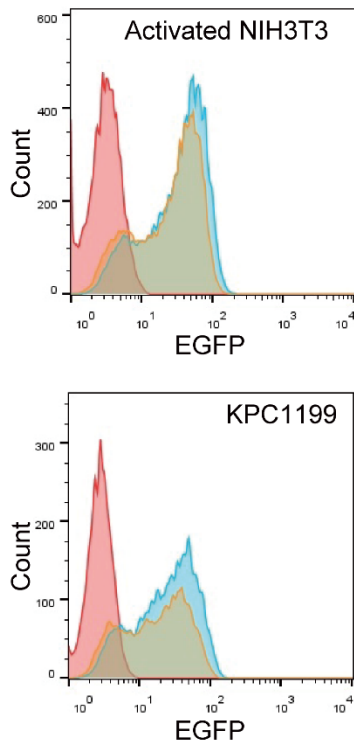

■ FHK-pVector@CaMP  
■ EGFP@Lipofectamine  
■ LTX with Plus™ Reagent  
■ EGFP-Nano-sapper

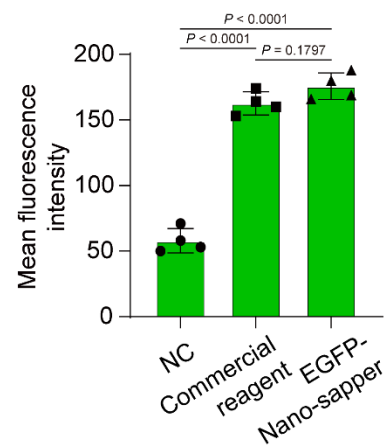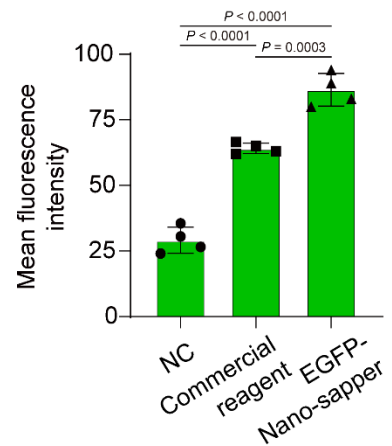

**Supplementary Figure 13** Representative scheme of plasmid and EGFP expression with different treatments. **a** The sequence of plasmid simultaneously encoding LIGHT and EGFP. **b** The transfection efficiency determined by flow cytometry. Negative control (NC), the non-EGFP coding vector plasmid loaded nanoparticle (FHK-pVector@CaMP). Data are presented as mean  $\pm$  s.d. ( $n = 3$  independent experiments). One-way ANOVA with Bonferroni multiple comparisons post-test was used for **b**. Error bars represent s.d..

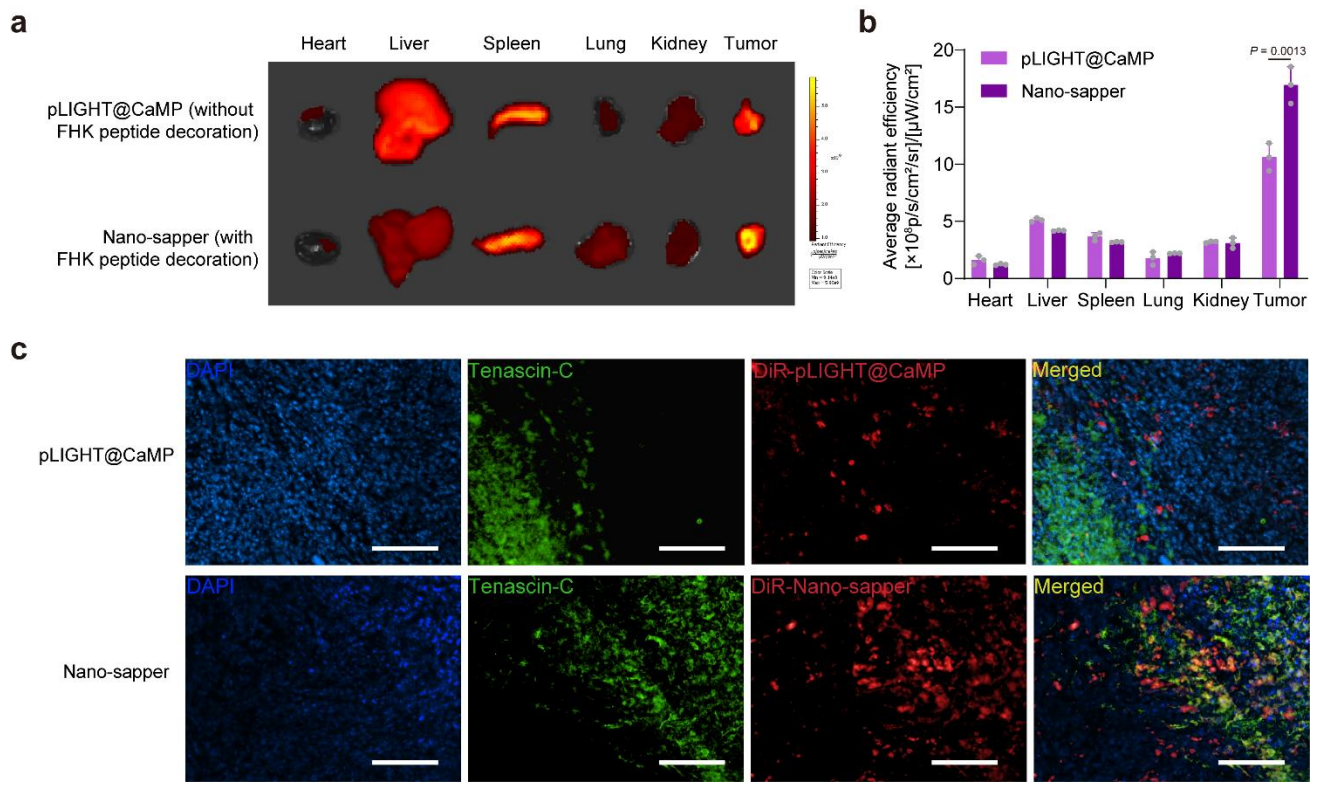

**Supplementary Figure 14** The PDAC targeting ability of FHK peptide. **a** Major organs and tumors were harvested and imaged 24 h after DiR-labelled nanoparticles *i.v.* administrated. **b** Semi-quantitative analysis according to fluorescence signal intensity ( $n = 3$  mice). **c** Tumors slices were stained with anti-Tenascin C antibodies. Paired Student's t test was used for **b**. Scale bars, 200  $\mu\text{m}$ . Error bars represent s.d.. Source data of Supplementary Fig. 14b are provided as a Source Data file.



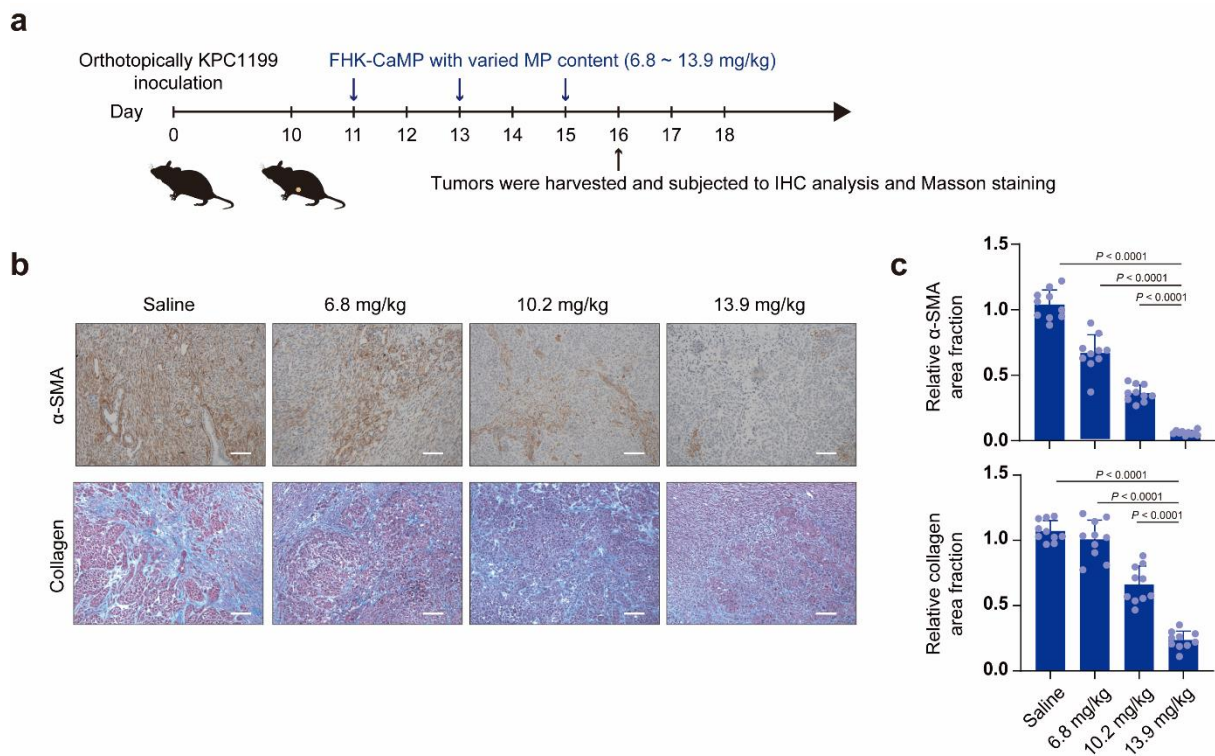

**Supplementary Figure 15** The determination of the optimized dosage of FHK-CaMP. **a** Six-week-old male C57BL/6 mice were orthotopically inoculated with KPC1199 cells ( $1 \times 10^6$ ) on day 0. Saline and FHK-CaMP with different MP dosage (6.8, 10.2 or 13.9 mg/kg) were *i.v.* administrated on day 11, 13 and 15. On day 16, tumors were harvested and subjected to IHC analysis and Masson staining. **b,c** Tumor slices were stained for  $\alpha$ -SMA and collagen, and determined by ImageJ. Scale bars, 100  $\mu$ m. ( $n = 10$  section images from three mice). Data are presented as mean  $\pm$  s.d. One-way ANOVA with Bonferroni multiple comparisons post-test was used for **c**. Error bars represent s.d..



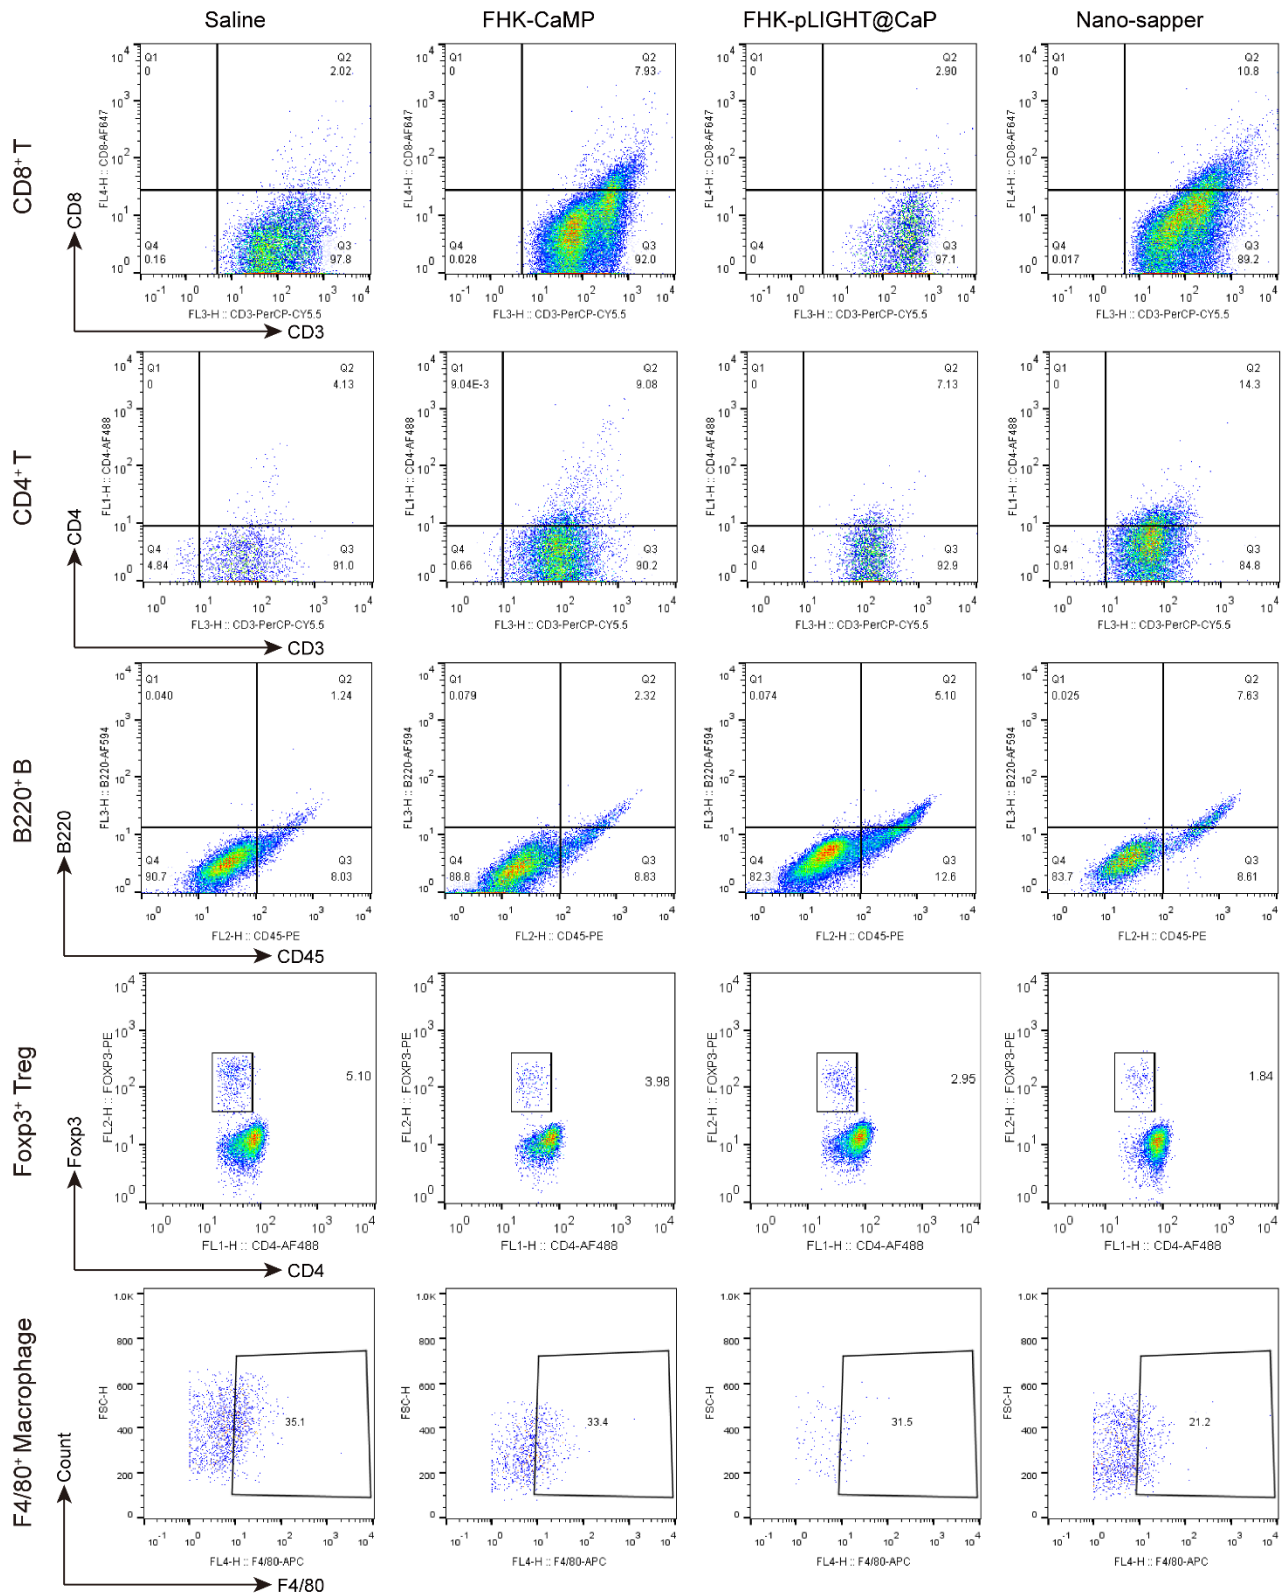

**Supplementary Figure 16** The representative flow cytometry plots of CD45<sup>+</sup>CD3<sup>+</sup>CD8<sup>+</sup> T cells, CD45<sup>+</sup> CD3<sup>+</sup>CD4<sup>+</sup> T cells, CD45<sup>+</sup>B220<sup>+</sup> B cells in tumors while decrease the ratio of CD4<sup>+</sup>Foxp3<sup>+</sup> Tregs and F4/80<sup>+</sup> macrophages.

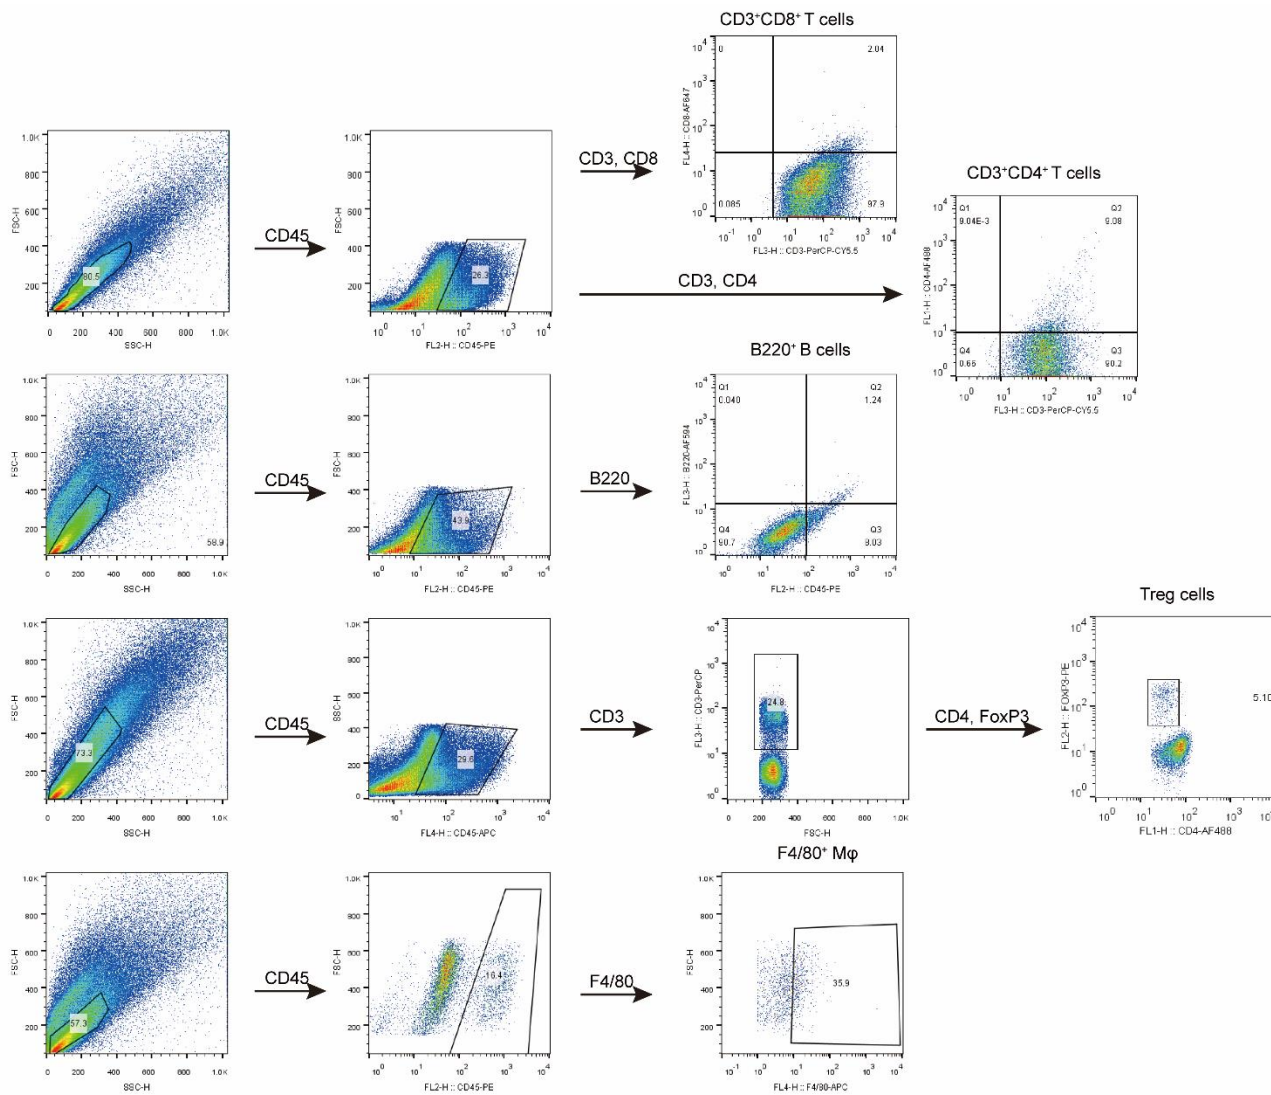

**Supplementary Figure 17** Gating strategies used for flow cytometry analysis of immune cell population.

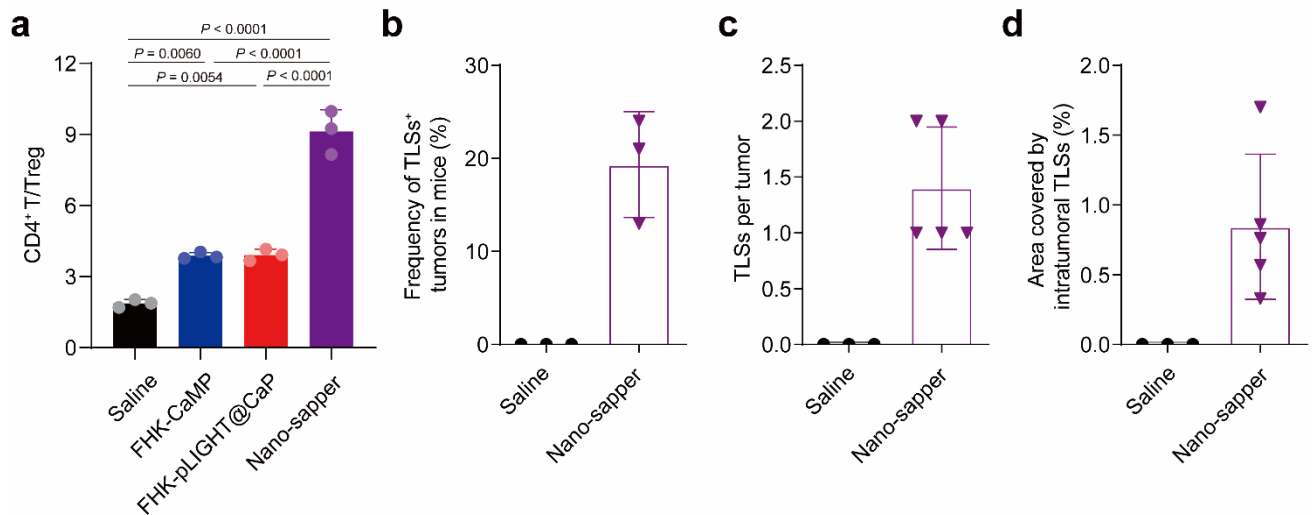

**Supplementary Figure 18** Nano-sapper modulate ratio of lymphocytes within TME and the quantitative determination of TLSs. **a** Nano-sapper increase the CD4<sup>+</sup> T/Treg ratio in TME ( $n = 3$  mice). **b** Frequency of TLSs<sup>+</sup> tumors in mice ( $n = 3$  mice). **c** TLSs per tumor ( $n = 5$  section images from three mice). **d** Area covered by intratumoral TLSs ( $n = 5$  section images from three mice). Data are presented as mean  $\pm$  s.d. One-way ANOVA with Bonferroni multiple comparisons post-test was used for **a**. Error bars represent s.d..

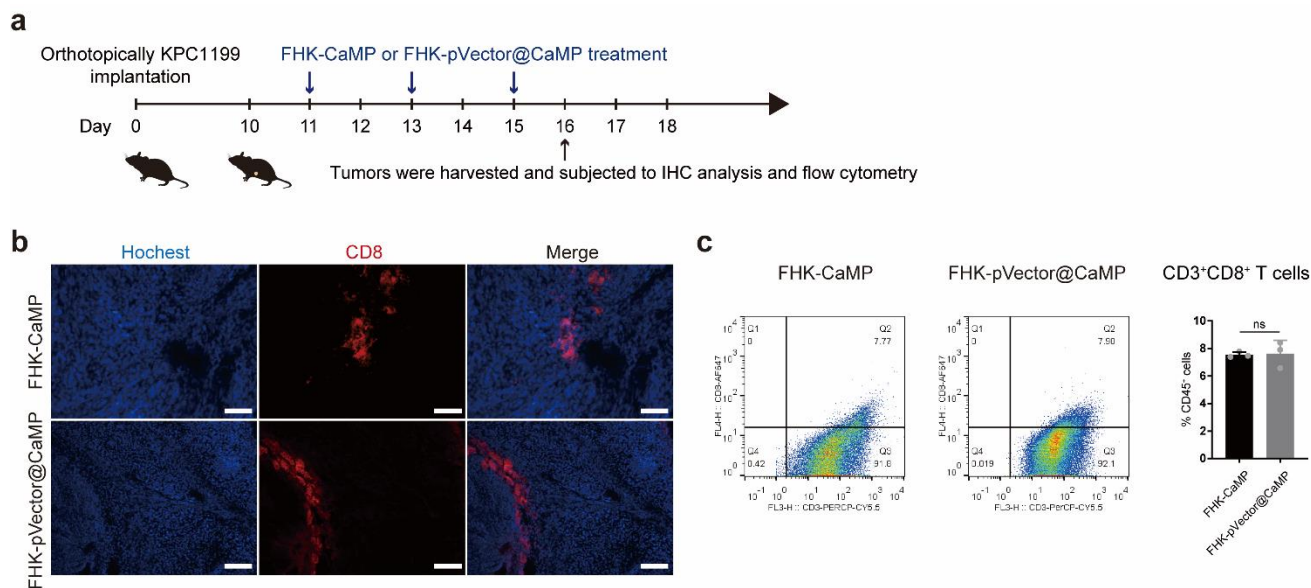

**Supplementary Figure 19** The loaded plasmid did not induce observable variation in the infiltration of CD8<sup>+</sup> T cell. **a** Six-week-old male C57BL/6 mice were orthotopically inoculated with KPC1199 cells ( $1 \times 10^6$ ) on day 0. FHK-CaMP (MP = 13.9 mg/kg), FHK-pVector@CaMP (MP = 13.9 mg/kg, 25 μg plasmid per mouse) were *i.v.* administrated every other day ( $n = 3$  mice). At day 16, tumors were extracted and subjected to IHC and flow cytometry assays. **b** Infiltration of CD8<sup>+</sup> T characterized by IHC. FHK-pVector@CaMP, nanoparticle loaded with scrambled LIGHT sequences-encoded vector plasmid. Scale bars, 100 μm. **c** Infiltration of CD8<sup>+</sup> T characterized by flow cytometry ( $n = 3$  mice). Data are presented as mean  $\pm$  s.d. One-way ANOVA with Bonferroni multiple comparisons post-test was used for **c**. ns, not significant. Error bars represent s.d..



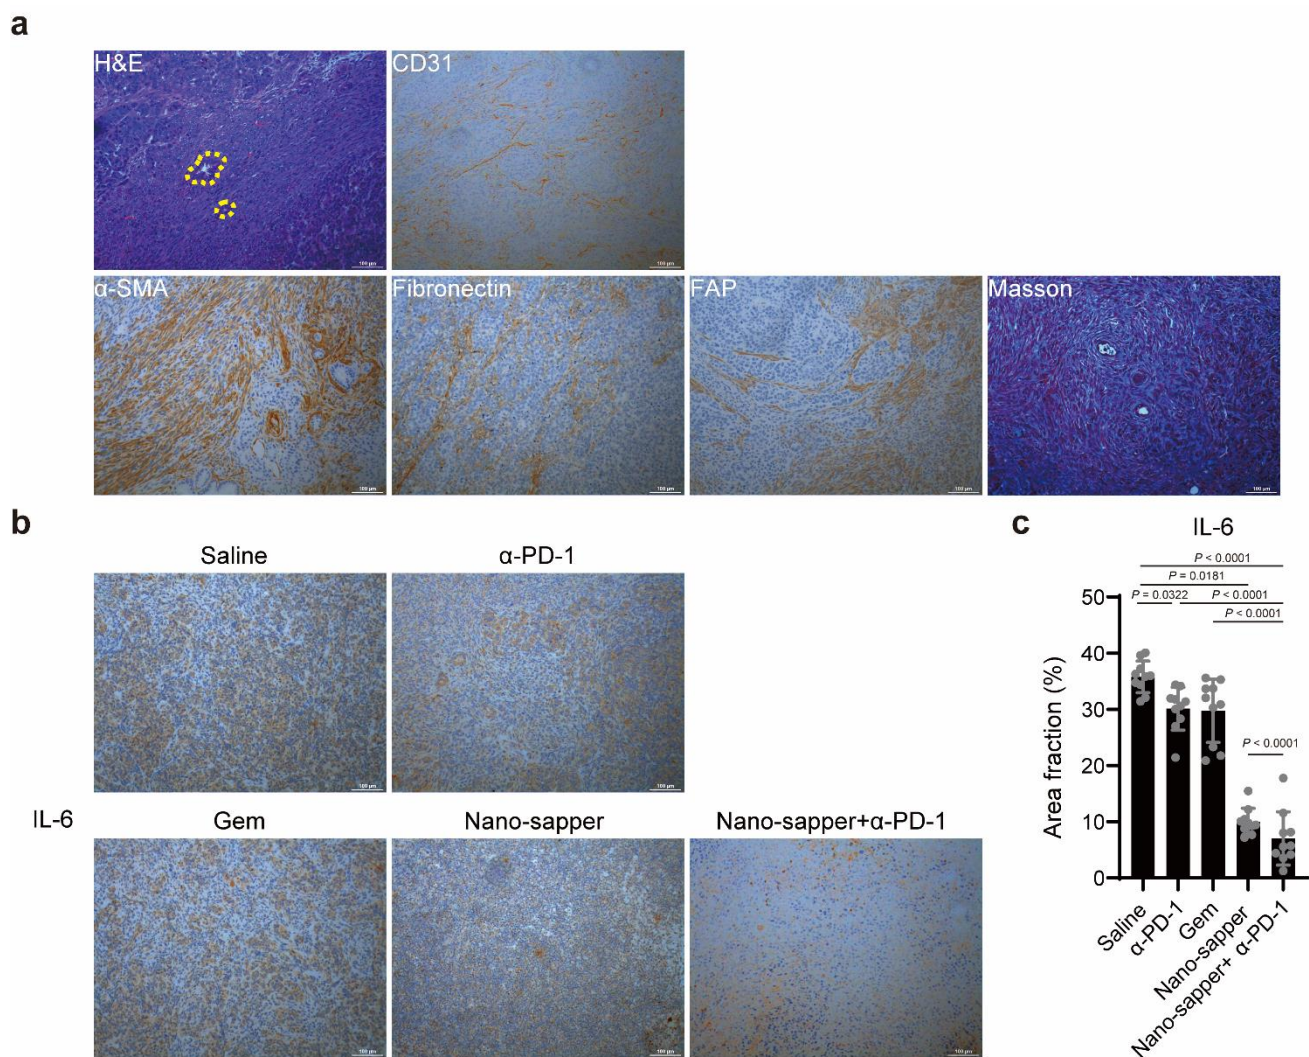

**Supplementary Figure 20** Histopathological features of KPC1199 model and IL-6 in TME was downregulated by Nano-sapper. **a** Histopathological characterization of KPC1199 model. Scale bars, 100  $\mu$ m. Yellow dash indicated the duct structure. **b,c** Nano-sapper reduced the expression of IL-6 ( $n = 10$  section images from three mice). Data were pooled from two independent experiments. Scale bars, 100  $\mu$ m. Data are presented as mean  $\pm$  s.d. One-way ANOVA with Bonferroni multiple comparisons post-test was used for **c**. Error bars represent s.d..

**Supplementary Table 1. Size and zeta potentials of nanoparticles.**

| Formulations   | Size<br>(nm) | Zeta potential<br>(mV) | PDI   |
|----------------|--------------|------------------------|-------|
| FHK-CaMP       | 36 ± 1.5     | 16 ± 0.2               | 0.173 |
| FHK-pLIGHT@CaP | 30 ± 0.4     | 13 ± 0.2               | 0.211 |
| Nano-sapper    | 35 ± 2.1     | 15 ± 0.4               | 0.194 |
| CaP            | 29 ± 1.7     | 13 ± 0.4               | 0.161 |

Data are presented as mean ± s.d.. ( $n = 3$  independent experiments)

**Supplementary Table 2. Median survival of orthotopic PDAC bearing mice (KPC1199).**

| Group                       | Median<br>(day) | Log-rank test (VS) |        |                |             |                             |
|-----------------------------|-----------------|--------------------|--------|----------------|-------------|-----------------------------|
|                             |                 | Saline             | Gem    | $\alpha$ -PD-1 | Nano-sapper | Nano-sapper+ $\alpha$ -PD-1 |
| Saline                      | 27.5            | \                  | \      | \              | \           | \                           |
| Gem                         | 34.5            | 0.0045             | \      | \              | \           | \                           |
| $\alpha$ -PD-1              | 29              | 0.4044             | 0.0190 | \              | \           | \                           |
| Nano-sapper                 | 41.5            | 0.0004             | 0.0055 | 0.0006         | \           | \                           |
| Nano-sapper+ $\alpha$ -PD-1 | 52              | 0.0004             | 0.0005 | 0.0006         | 0.0022      | \                           |

Differences in survival were determined for each group by the Kaplan–Meier analysis with log-rank Mantel-Cox test (two-sided).

**Supplementary Table 3. Median survival of orthotopic PDAC bearing mice (Panc02).**

| Group                           | Median<br>(day) | Log-rank test (VS) |        |                |                 |                                 |
|---------------------------------|-----------------|--------------------|--------|----------------|-----------------|---------------------------------|
|                                 |                 | Saline             | Gem    | $\alpha$ -PD-1 | Nano-<br>sapper | Nano-sapper+ $\alpha$ -<br>PD-1 |
| Saline                          | 31              | \                  | \      | \              | \               | \                               |
| Gem                             | 39              | 0.0066             | \      | \              | \               | \                               |
| $\alpha$ -PD-1                  | 33.5            | 0.3024             | 0.0323 | \              | \               | \                               |
| Nano-sapper                     | 43              | 0.0005             | 0.0726 | 0.0006         | \               | \                               |
| Nano-<br>sapper+ $\alpha$ -PD-1 | 53.5            | 0.0005             | 0.0005 | 0.0006         | 0.0015          | \                               |

Differences in survival were determined for each group by the Kaplan–Meier analysis with log-rank Mantel-Cox test (two-sided).

**Supplementary method. Antibodies used in this study.**

| Antibodies                          | Company     | Catalog    | Application and Dilution  |
|-------------------------------------|-------------|------------|---------------------------|
| Anti-CD31                           | Abcam       | ab28364    | IHC-F, 1/50               |
| Anti-VE-cadherin                    | Abcam       | ab33168    | IHC-F, 1/100              |
| Anti-ICAM-1                         | Abcam       | ab171123   | IHC-F, 1/100              |
| Anti-MECA79                         | Biolegend   | 120801     | IHC-F, 1/50               |
| AF488 Goat Anti-Rabbit IgG<br>H&L   | Abcam       | ab150077   | IHC-F, 1/600              |
| Anti- $\alpha$ -SMA                 | Abcam       | ab5694     | WB, 1/1000; IHC-P, 1/200  |
| Anti-FAP                            | Abcam       | ab207178   | WB, 1/1000; IHC-P, 1/250  |
| Anti-fibronectin                    | Abcam       | ab23750    | WB, 1/1000 , IHC-P, 1/500 |
| Anti-Smad2                          | Abcam       | ab33875    | WB, 1/2000                |
| Anti-p-Smad2                        | Abcam       | ab53100    | WB, 1/1000                |
| Anti-Smad3                          | Abcam       | ab28379    | WB, 1/1000                |
| Anti-p-Smad3                        | Abcam       | ab52903    | WB, 1/2000                |
| Anti-GAPDH                          | Abcam       | ab8245     | WB, 1/10000               |
| Goat anti-rabbit HRP                | Abcam       | ab205718   | WB, 1/25000               |
| PE anti-mouse CD45                  | Biolegend   | 103106     | FC, 1/100                 |
| APC anti-mouse CD45                 | Biolegend   | 103112     | FC, 1/100                 |
| PerCP-Cy5.5-anti mouse CD3e         | eBioscience | 45-0031-82 | FC, 1/20                  |
| AF647 anti-mouse CD8a               | Biolegend   | 100724     | FC, 1/200; IHC-F, 1/100   |
| AF647 anti-mouse CD4                | Biolegend   | 100424     | IHC-F, 1/100              |
| AF488 anti-mouse CD4                | Biolegend   | 100423     | FC, 1/1000; IHC-F, 1/100  |
| Alexa Fluor 647 anti-mouse<br>FoxP3 | Biolegend   | 126408     | FC, 1/50                  |
| AF594 anti-mouse B220               | Biolegend   | 103254     | FC, 1/200, IHC-F, 1/10    |
| APC anti-mouse F4/80                | Biolegend   | 123116     | FC, 1/100                 |
